# Supplementary material
Source: publisher figshare collection journal article supplement (https://acs.figshare.com/ndownloader/files/4685908)
Supplement: Supplementary file 1 [file 4685908]

 
data_1 
 
_audit_creation_method            SHELXL-97 
_chemical_name_systematic 
; 
 ? 
; 
_chemical_name_common             ? 
_chemical_formula_moiety          ? 
_chemical_formula_sum             'C42 H60 Cr O6' 
_chemical_formula_weight          712.90 
 
loop_ 
 _atom_type_symbol 
 _atom_type_description 
 _atom_type_scat_dispersion_real 
 _atom_type_scat_dispersion_imag 
 _atom_type_scat_source 
 'C'  'C'   0.0033   0.0016 
 'International Tables Vol C Tables 4.2.6.8 and 6.1.1.4' 
 'H'  'H'   0.0000   0.0000 
 'International Tables Vol C Tables 4.2.6.8 and 6.1.1.4' 
 'O'  'O'   0.0106   0.0060 
 'International Tables Vol C Tables 4.2.6.8 and 6.1.1.4' 
 'Cr'  'Cr'   0.3209   0.6236 
 'International Tables Vol C Tables 4.2.6.8 and 6.1.1.4' 
 
_symmetry_cell_setting            'Monoclinic' 
_symmetry_space_group_name_H-M    'C2/c' 
 
loop_ 
 _symmetry_equiv_pos_as_xyz 
 'x, y, z' 
 '-x, y, -z+1/2' 
 'x+1/2, y+1/2, z' 
 '-x+1/2, y+1/2, -z+1/2' 
 '-x, -y, -z' 
 'x, -y, z-1/2' 
 '-x+1/2, -y+1/2, -z' 
 'x+1/2, -y+1/2, z-1/2' 
 
_cell_length_a                    22.1182(9) 
_cell_length_b                    19.1114(9) 
_cell_length_c                    10.0921(3) 
_cell_angle_alpha                 90.00 
_cell_angle_beta                  95.184(5) 
_cell_angle_gamma                 90.00 
_cell_volume                      4248.6(3) 
_cell_formula_units_Z             4 
_cell_measurement_temperature     100(2) 
_cell_measurement_reflns_used     ? 
_cell_measurement_theta_min       ? 
_cell_measurement_theta_max       ? 
 
_exptl_crystal_description        ? 
_exptl_crystal_colour             ? 
_exptl_crystal_size_max           0.10 
_exptl_crystal_size_mid           0.07 
_exptl_crystal_size_min           0.02 
_exptl_crystal_density_meas       ? 
_exptl_crystal_density_diffrn     1.115 
_exptl_crystal_density_method     'not measured' 
_exptl_crystal_F_000              1536 
_exptl_absorpt_coefficient_mu     0.310 
_exptl_absorpt_correction_type    'None' 
_exptl_absorpt_correction_T_min   ? 
_exptl_absorpt_correction_T_max   ?
 
_exptl_special_details 
; 
 ? 
; 
 
_diffrn_ambient_temperature       100(2) 
_diffrn_radiation_wavelength      0.71073 
_diffrn_radiation_type            MoK\a 
_diffrn_radiation_source          'rotating anode, 50 kV, 70 mA' 
_diffrn_radiation_monochromator   graphite 
_diffrn_measurement_device_type   'Bruker-Nonius Kappa-CCD' 
_diffrn_measurement_method        ? 
_diffrn_detector_area_resol_mean  ? 
_diffrn_standards_number          ? 
_diffrn_standards_interval_count  ? 
_diffrn_standards_interval_time   ? 
_diffrn_standards_decay_%         ? 
_diffrn_reflns_number             13998 
_diffrn_reflns_av_R_equivalents   0.1032 
_diffrn_reflns_av_sigmaI/netI     0.0913 
_diffrn_reflns_limit_h_min        -24 
_diffrn_reflns_limit_h_max        26 
_diffrn_reflns_limit_k_min        -22 
_diffrn_reflns_limit_k_max        22 
_diffrn_reflns_limit_l_min        -10 
_diffrn_reflns_limit_l_max        12 
_diffrn_reflns_theta_min          4.05 
_diffrn_reflns_theta_max          25.00 
_reflns_number_total              3727 
_reflns_number_gt                 2401 
_reflns_threshold_expression      >2sigma(I) 
 
_computing_data_collection        'Nonius Collect Software' 
_computing_cell_refinement        'Nonius Collect Software' 
_computing_data_reduction         'Nonius Collect Software' 
_computing_structure_solution     'SHELXS-97 (Sheldrick, 1990)' 
_computing_structure_refinement   'SHELXL-97 (Sheldrick, 1997)' 
_computing_molecular_graphics     ? 
_computing_publication_material   ? 
 
_refine_special_details 
; 
 Refinement of F^2^ against ALL reflections.  The weighted R-factor wR and 
 goodness of fit S are based on F^2^, conventional R-factors R are based 
 on F, with F set to zero for negative F^2^. The threshold expression of 
 F^2^ > 2sigma(F^2^) is used only for calculating R-factors(gt) etc. and is 
 not relevant to the choice of reflections for refinement.  R-factors based 
 on F^2^ are statistically about twice as large as those based on F, and R- 
 factors based on ALL data will be even larger. 
; 
 
_refine_ls_structure_factor_coef  Fsqd  
_refine_ls_matrix_type            full 
_refine_ls_weighting_scheme 
 'calc w=1/[\s^2^(Fo^2^)+(0.0237P)^2^+10.3013P] where P=(Fo^2^+2Fc^2^)/3' 
_atom_sites_solution_primary      direct 
_atom_sites_solution_secondary    difmap 
_atom_sites_solution_hydrogens    geom 
_refine_ls_hydrogen_treatment     mixed 
_refine_ls_extinction_method      none 
_refine_ls_extinction_coef        ? 
_refine_ls_number_reflns          3727 
_refine_ls_number_parameters      222 
_refine_ls_number_restraints      0 
_refine_ls_R_factor_all           0.1112 
_refine_ls_R_factor_gt            0.0578 
_refine_ls_wR_factor_ref          0.1252 
_refine_ls_wR_factor_gt           0.1020 
_refine_ls_goodness_of_fit_ref    1.058 
_refine_ls_restrained_S_all       1.058 
_refine_ls_shift/su_max           0.000 
_refine_ls_shift/su_mean          0.000 
 
loop_ 
 _atom_site_label 
 _atom_site_type_symbol 
 _atom_site_fract_x 
 _atom_site_fract_y 
 _atom_site_fract_z 
 _atom_site_U_iso_or_equiv 
 _atom_site_adp_type 
 _atom_site_occupancy 
 _atom_site_calc_flag 
 _atom_site_refinement_flags 
 _atom_site_disorder_assembly 
 _atom_site_disorder_group 
Cr1 Cr 0.0000 0.27754(4) 0.7500 0.0237(2) Uani 1 d S . . 
O1 O 0.06071(10) 0.34430(11) 0.7072(2) 0.0233(5) Uani 1 d . . . 
C1 C 0.10670(15) 0.34980(16) 0.7980(3) 0.0227(8) Uani 1 d . . . 
O2 O 0.04773(9) 0.27953(11) 0.9203(2) 0.0245(5) Uani 1 d . . . 
C2 C 0.09984(14) 0.31136(16) 0.9184(3) 0.0226(8) Uani 1 d . . . 
C3 C 0.14694(15) 0.30818(17) 1.0256(3) 0.0241(8) Uani 1 d . . . 
C4 C 0.19774(16) 0.34613(17) 1.0037(3) 0.0267(8) Uani 1 d . . . 
H4 H 0.2308 0.3458 1.0706 0.032 Uiso 1 calc R . . 
C5 C 0.20359(15) 0.38593(17) 0.8867(3) 0.0266(8) Uani 1 d . . . 
H5 H 0.2402 0.4113 0.8810 0.032 Uiso 1 calc R . . 
C6 C 0.15992(15) 0.39025(17) 0.7814(3) 0.0249(8) Uani 1 d . . . 
C7 C 0.16575(16) 0.43287(17) 0.6553(3) 0.0277(8) Uani 1 d . . . 
C8 C 0.11400(17) 0.48592(19) 0.6357(4) 0.0397(10) Uani 1 d . . . 
H8A H 0.1181 0.5130 0.5546 0.060 Uiso 1 calc R . . 
H8B H 0.1156 0.5176 0.7124 0.060 Uiso 1 calc R . . 
H8C H 0.0750 0.4612 0.6276 0.060 Uiso 1 calc R . . 
C9 C 0.22580(17) 0.4732(2) 0.6639(4) 0.0409(10) Uani 1 d . . . 
H9A H 0.2284 0.5000 0.5819 0.061 Uiso 1 calc R . . 
H9B H 0.2597 0.4401 0.6753 0.061 Uiso 1 calc R . . 
H9C H 0.2277 0.5052 0.7401 0.061 Uiso 1 calc R . . 
C10 C 0.16453(18) 0.3836(2) 0.5349(3) 0.0405(10) Uani 1 d . . . 
H10A H 0.1683 0.4111 0.4541 0.061 Uiso 1 calc R . . 
H10B H 0.1261 0.3578 0.5261 0.061 Uiso 1 calc R . . 
H10C H 0.1984 0.3505 0.5476 0.061 Uiso 1 calc R . . 
C11 C 0.13903(15) 0.26431(18) 1.1490(3) 0.0272(8) Uani 1 d . . . 
C12 C 0.12738(17) 0.18766(18) 1.1082(4) 0.0336(9) Uani 1 d . . . 
H12A H 0.1223 0.1595 1.1876 0.050 Uiso 1 calc R . . 
H12B H 0.1619 0.1699 1.0640 0.050 Uiso 1 calc R . . 
H12C H 0.0905 0.1847 1.0470 0.050 Uiso 1 calc R . . 
C13 C 0.08541(16) 0.29252(19) 1.2200(3) 0.0351(9) Uani 1 d . . . 
H13A H 0.0805 0.2642 1.2993 0.053 Uiso 1 calc R . . 
H13B H 0.0482 0.2901 1.1596 0.053 Uiso 1 calc R . . 
H13C H 0.0933 0.3412 1.2465 0.053 Uiso 1 calc R . . 
C14 C 0.19642(16) 0.26681(19) 1.2466(3) 0.0346(9) Uani 1 d . . . 
H14A H 0.1903 0.2383 1.3250 0.052 Uiso 1 calc R . . 
H14B H 0.2047 0.3153 1.2742 0.052 Uiso 1 calc R . . 
H14C H 0.2309 0.2484 1.2031 0.052 Uiso 1 calc R . . 
O21 O 0.04842(10) 0.20029(11) 0.6912(2) 0.0235(5) Uani 1 d . . . 
C21 C 0.02741(14) 0.13828(17) 0.7149(3) 0.0218(7) Uani 1 d . . . 
C22 C 0.05504(15) 0.07482(17) 0.6775(3) 0.0247(8) Uani 1 d . . . 
C23 C 0.02630(14) 0.01529(18) 0.7141(3) 0.0283(8) Uani 1 d . . . 
H23 H 0.0424 -0.0286 0.6902 0.034 Uiso 1 calc R . . 
C24 C 0.11186(15) 0.07577(18) 0.6031(3) 0.0280(8) Uani 1 d . . . 
C25 C 0.16380(16) 0.11078(19) 0.6917(4) 0.0368(9) Uani 1 d . . . 
H25A H 0.2006 0.1116 0.6445 0.055 Uiso 1 calc R . . 
H25B H 0.1716 0.0842 0.7745 0.055 Uiso 1 calc R . . 
H25C H 0.1522 0.1588 0.7122 0.055 Uiso 1 calc R . . 
C26 C 0.10027(17) 0.1170(2) 0.4727(3) 0.0382(10) Uani 1 d . . . 
H26A H 0.1372 0.1172 0.4259 0.057 Uiso 1 calc R . . 
H26B H 0.0890 0.1652 0.4926 0.057 Uiso 1 calc R . . 
H26C H 0.0672 0.0950 0.4165 0.057 Uiso 1 calc R . . 
C27 C 0.13181(16) 0.00164(18) 0.5688(4) 0.0359(9) Uani 1 d . . . 
H27A H 0.1684 0.0041 0.5211 0.054 Uiso 1 calc R . . 
H27B H 0.0993 -0.0213 0.5124 0.054 Uiso 1 calc R . . 
H27C H 0.1405 -0.0253 0.6509 0.054 Uiso 1 calc R . . 
 
loop_ 
 _atom_site_aniso_label 
 _atom_site_aniso_U_11 
 _atom_site_aniso_U_22 
 _atom_site_aniso_U_33 
 _atom_site_aniso_U_23 
 _atom_site_aniso_U_13 
 _atom_site_aniso_U_12 
Cr1 0.0207(4) 0.0192(4) 0.0313(4) 0.000 0.0029(3) 0.000 
O1 0.0202(13) 0.0196(13) 0.0302(13) 0.0017(10) 0.0023(10) -0.0025(10) 
C1 0.0199(19) 0.0168(17) 0.0312(19) -0.0040(15) 0.0015(15) 0.0029(14) 
O2 0.0213(13) 0.0233(13) 0.0290(12) 0.0024(11) 0.0036(10) 0.0012(11) 
C2 0.0159(18) 0.0186(18) 0.0342(19) -0.0029(15) 0.0078(15) -0.0006(14) 
C3 0.0218(19) 0.0214(18) 0.0291(18) -0.0066(15) 0.0024(15) 0.0015(15) 
C4 0.024(2) 0.026(2) 0.0299(19) -0.0039(16) -0.0008(15) 0.0003(15) 
C5 0.0214(19) 0.025(2) 0.034(2) -0.0050(16) 0.0058(16) -0.0058(15) 
C6 0.0252(19) 0.0218(19) 0.0282(19) -0.0053(15) 0.0055(15) 0.0016(15) 
C7 0.028(2) 0.022(2) 0.033(2) 0.0033(16) 0.0050(16) -0.0027(15) 
C8 0.043(2) 0.033(2) 0.043(2) 0.0123(19) 0.0047(19) -0.0042(18) 
C9 0.038(2) 0.044(2) 0.041(2) 0.0115(19) 0.0087(18) -0.0086(19) 
C10 0.045(3) 0.046(3) 0.032(2) 0.0010(19) 0.0098(18) -0.004(2) 
C11 0.026(2) 0.029(2) 0.0263(18) 0.0022(16) 0.0006(15) 0.0000(15) 
C12 0.034(2) 0.030(2) 0.037(2) 0.0060(17) 0.0005(17) -0.0001(17) 
C13 0.037(2) 0.039(2) 0.030(2) 0.0013(17) 0.0060(17) 0.0008(17) 
C14 0.037(2) 0.036(2) 0.0300(19) 0.0026(17) 0.0017(16) -0.0013(18) 
O21 0.0190(13) 0.0185(13) 0.0336(13) -0.0003(10) 0.0051(10) -0.0003(9) 
C21 0.0205(18) 0.0236(19) 0.0210(18) 0.0024(15) -0.0003(14) -0.0001(14) 
C22 0.0248(19) 0.0238(19) 0.0255(18) 0.0011(15) 0.0016(15) 0.0016(15) 
C23 0.027(2) 0.0221(19) 0.036(2) -0.0023(16) 0.0044(16) 0.0064(15) 
C24 0.026(2) 0.025(2) 0.034(2) 0.0002(16) 0.0098(16) 0.0031(15) 
C25 0.022(2) 0.034(2) 0.055(2) -0.0006(19) 0.0081(18) 0.0041(16) 
C26 0.040(2) 0.040(2) 0.037(2) -0.0003(18) 0.0132(18) 0.0025(19) 
C27 0.030(2) 0.034(2) 0.046(2) -0.0029(18) 0.0152(18) 0.0039(17) 
 
_geom_special_details 
; 
 All esds (except the esd in the dihedral angle between two l.s. planes) 
 are estimated using the full covariance matrix.  The cell esds are taken 
 into account individually in the estimation of esds in distances, angles 
 and torsion angles; correlations between esds in cell parameters are only 
 used when they are defined by crystal symmetry.  An approximate (isotropic) 
 treatment of cell esds is used for estimating esds involving l.s. planes. 
; 
 
loop_ 
 _geom_bond_atom_site_label_1 
 _geom_bond_atom_site_label_2 
 _geom_bond_distance 
 _geom_bond_site_symmetry_2 
 _geom_bond_publ_flag 
Cr1 O1 1.929(2) . ? 
Cr1 O1 1.929(2) 2_556 ? 
Cr1 O2 1.934(2) . ? 
Cr1 O2 1.934(2) 2_556 ? 
Cr1 O21 1.947(2) 2_556 ? 
Cr1 O21 1.947(2) . ? 
O1 C1 1.310(4) . ? 
C1 C6 1.431(4) . ? 
C1 C2 1.440(4) . ? 
O2 C2 1.305(4) . ? 
C2 C3 1.433(4) . ? 
C3 C4 1.372(4) . ? 
C3 C11 1.525(5) . ? 
C4 C5 1.420(5) . ? 
C5 C6 1.372(4) . ? 
C6 C7 1.527(5) . ? 
C7 C8 1.529(5) . ? 
C7 C9 1.531(5) . ? 
C7 C10 1.536(5) . ? 
C11 C14 1.536(5) . ? 
C11 C12 1.537(5) . ? 
C11 C13 1.538(4) . ? 
O21 C21 1.303(4) . ? 
C21 C22 1.425(4) . ? 
C21 C21 1.458(6) 2_556 ? 
C22 C23 1.370(4) . ? 
C22 C24 1.521(4) . ? 
C23 C23 1.425(6) 2_556 ? 
C24 C27 1.533(5) . ? 
C24 C26 1.535(5) . ? 
C24 C25 1.543(5) . ? 
 
loop_ 
 _geom_angle_atom_site_label_1 
 _geom_angle_atom_site_label_2 
 _geom_angle_atom_site_label_3 
 _geom_angle 
 _geom_angle_site_symmetry_1 
 _geom_angle_site_symmetry_3 
 _geom_angle_publ_flag 
O1 Cr1 O1 97.19(13) . 2_556 ? 
O1 Cr1 O2 81.41(9) . . ? 
O1 Cr1 O2 97.08(9) 2_556 . ? 
O1 Cr1 O2 97.08(9) . 2_556 ? 
O1 Cr1 O2 81.41(9) 2_556 2_556 ? 
O2 Cr1 O2 177.74(14) . 2_556 ? 
O1 Cr1 O21 169.25(9) . 2_556 ? 
O1 Cr1 O21 91.16(9) 2_556 2_556 ? 
O2 Cr1 O21 90.88(9) . 2_556 ? 
O2 Cr1 O21 90.83(9) 2_556 2_556 ? 
O1 Cr1 O21 91.16(9) . . ? 
O1 Cr1 O21 169.25(9) 2_556 . ? 
O2 Cr1 O21 90.83(9) . . ? 
O2 Cr1 O21 90.88(9) 2_556 . ? 
O21 Cr1 O21 81.42(13) 2_556 . ? 
C1 O1 Cr1 114.14(19) . . ? 
O1 C1 C6 123.8(3) . . ? 
O1 C1 C2 114.5(3) . . ? 
C6 C1 C2 121.7(3) . . ? 
C2 O2 Cr1 114.09(19) . . ? 
O2 C2 C3 123.5(3) . . ? 
O2 C2 C1 114.2(3) . . ? 
C3 C2 C1 122.2(3) . . ? 
C4 C3 C2 114.0(3) . . ? 
C4 C3 C11 125.3(3) . . ? 
C2 C3 C11 120.7(3) . . ? 
C3 C4 C5 123.7(3) . . ? 
C6 C5 C4 124.4(3) . . ? 
C5 C6 C1 114.0(3) . . ? 
C5 C6 C7 124.8(3) . . ? 
C1 C6 C7 121.2(3) . . ? 
C6 C7 C8 110.1(3) . . ? 
C6 C7 C9 111.1(3) . . ? 
C8 C7 C9 108.0(3) . . ? 
C6 C7 C10 109.6(3) . . ? 
C8 C7 C10 110.2(3) . . ? 
C9 C7 C10 107.9(3) . . ? 
C3 C11 C14 111.0(3) . . ? 
C3 C11 C12 109.5(3) . . ? 
C14 C11 C12 108.1(3) . . ? 
C3 C11 C13 109.8(3) . . ? 
C14 C11 C13 108.5(3) . . ? 
C12 C11 C13 110.0(3) . . ? 
C21 O21 Cr1 114.74(19) . . ? 
O21 C21 C22 123.9(3) . . ? 
O21 C21 C21 114.52(16) . 2_556 ? 
C22 C21 C21 121.62(18) . 2_556 ? 
C23 C22 C21 114.5(3) . . ? 
C23 C22 C24 124.5(3) . . ? 
C21 C22 C24 120.9(3) . . ? 
C22 C23 C23 123.8(2) . 2_556 ? 
C22 C24 C27 111.6(3) . . ? 
C22 C24 C26 110.3(3) . . ? 
C27 C24 C26 108.1(3) . . ? 
C22 C24 C25 108.9(3) . . ? 
C27 C24 C25 108.5(3) . . ? 
C26 C24 C25 109.4(3) . . ? 
 
_diffrn_measured_fraction_theta_max    0.482 
_diffrn_reflns_theta_full              25.00 
_diffrn_measured_fraction_theta_full   0.482 
_refine_diff_density_max    0.295 
_refine_diff_density_min   -0.337 
_refine_diff_density_rms    0.062 

#===END
 
data_3 
 
_audit_creation_method            SHELXL-97 
_chemical_name_systematic 
; 
 ? 
; 
_chemical_name_common             ? 
_chemical_formula_moiety          '[C16 H36 N]+,[C42 H60 Cr S6]-' 
_chemical_formula_sum             'C58 H96 Cr N S6' 
_chemical_formula_weight          1051.72 
 
loop_ 
 _atom_type_symbol 
 _atom_type_description 
 _atom_type_scat_dispersion_real 
 _atom_type_scat_dispersion_imag 
 _atom_type_scat_source 
 'C'  'C'   0.0033   0.0016 
 'International Tables Vol C Tables 4.2.6.8 and 6.1.1.4' 
 'H'  'H'   0.0000   0.0000 
 'International Tables Vol C Tables 4.2.6.8 and 6.1.1.4' 
 'N'  'N'   0.0061   0.0033 
 'International Tables Vol C Tables 4.2.6.8 and 6.1.1.4' 
 'S'  'S'   0.1246   0.1234 
 'International Tables Vol C Tables 4.2.6.8 and 6.1.1.4' 
 'Cr'  'Cr'   0.3209   0.6236 
 'International Tables Vol C Tables 4.2.6.8 and 6.1.1.4' 
 
_symmetry_cell_setting            'Monoclinic'
_symmetry_space_group_name_H-M    'P2(1)/c' 
 
loop_ 
 _symmetry_equiv_pos_as_xyz 
 'x, y, z' 
 '-x, y+1/2, -z+1/2' 
 '-x, -y, -z' 
 'x, -y-1/2, z-1/2' 
 
_cell_length_a                    14.4072(8) 
_cell_length_b                    21.579(2) 
_cell_length_c                    20.1333(12) 
_cell_angle_alpha                 90.00 
_cell_angle_beta                  90.703(5) 
_cell_angle_gamma                 90.00 
_cell_volume                      6258.8(8) 
_cell_formula_units_Z             4 
_cell_measurement_temperature     100(2) 
_cell_measurement_reflns_used     ? 
_cell_measurement_theta_min       ? 
_cell_measurement_theta_max       ? 
 
_exptl_crystal_description        'transparent parallelepiped' 
_exptl_crystal_colour             'dark brown' 
_exptl_crystal_size_max           0.14 
_exptl_crystal_size_mid           0.12 
_exptl_crystal_size_min           0.05 
_exptl_crystal_density_meas       ? 
_exptl_crystal_density_diffrn     1.116 
_exptl_crystal_density_method     'not measured' 
_exptl_crystal_F_000              2284 
_exptl_absorpt_coefficient_mu     0.417 
_exptl_absorpt_correction_type    'none' 
_exptl_absorpt_correction_T_min   ?
_exptl_absorpt_correction_T_max   ?
 
_exptl_special_details 
; 
 ? 
; 
 
_diffrn_ambient_temperature       100(2) 
_diffrn_radiation_wavelength      0.71073 
_diffrn_radiation_type            MoK\a 
_diffrn_radiation_source          'rotating anode, 50 kV, 70 mA' 
_diffrn_radiation_monochromator   graphite 
_diffrn_measurement_device_type   'Bruker-Nonius Kappa-CCD' 
_diffrn_measurement_method
'263 images at 1.0 deg. in phi, 67 images at 1.0 deg. in \w, 220 sec./frame'
_diffrn_detector_area_resol_mean  ? 
_diffrn_standards_number          ? 
_diffrn_standards_interval_count  ? 
_diffrn_standards_interval_time   ? 
_diffrn_standards_decay_%         ? 
_diffrn_reflns_number             38236 
_diffrn_reflns_av_R_equivalents   0.1015 
_diffrn_reflns_av_sigmaI/netI     0.0973 
_diffrn_reflns_limit_h_min        -16 
_diffrn_reflns_limit_h_max        16 
_diffrn_reflns_limit_k_min        -24 
_diffrn_reflns_limit_k_max        24 
_diffrn_reflns_limit_l_min        -22 
_diffrn_reflns_limit_l_max        23 
_diffrn_reflns_theta_min          3.40 
_diffrn_reflns_theta_max          24.00 
_reflns_number_total              9790 
_reflns_number_gt                 6355 
_reflns_threshold_expression      >2sigma(I) 
 
_computing_data_collection        'Nonius Collect Software' 
_computing_cell_refinement        'Nonius Collect Software' 
_computing_data_reduction         'Nonius Collect Software' 
_computing_structure_solution     'SHELXS-97 (Sheldrick, 1990)' 
_computing_structure_refinement   'SHELXL-97 (Sheldrick, 1997)' 
_computing_molecular_graphics     ? 
_computing_publication_material   ? 
 
_refine_special_details 
; 
 Refinement of F^2^ against ALL reflections.  The weighted R-factor wR and 
 goodness of fit S are based on F^2^, conventional R-factors R are based 
 on F, with F set to zero for negative F^2^. The threshold expression of 
 F^2^ > 2sigma(F^2^) is used only for calculating R-factors(gt) etc. and is 
 not relevant to the choice of reflections for refinement.  R-factors based 
 on F^2^ are statistically about twice as large as those based on F, and R- 
 factors based on ALL data will be even larger. 
; 
 
_refine_ls_structure_factor_coef  Fsqd  
_refine_ls_matrix_type            full 
_refine_ls_weighting_scheme 
 'calc w=1/[\s^2^(Fo^2^)+(0.0516P)^2^+15.5968P] where P=(Fo^2^+2Fc^2^)/3' 
_atom_sites_solution_primary      direct 
_atom_sites_solution_secondary    difmap 
_atom_sites_solution_hydrogens    geom 
_refine_ls_hydrogen_treatment     mixed 
_refine_ls_extinction_method      none 
_refine_ls_extinction_coef        ? 
_refine_ls_number_reflns          9790 
_refine_ls_number_parameters      617 
_refine_ls_number_restraints      0 
_refine_ls_R_factor_all           0.1212 
_refine_ls_R_factor_gt            0.0685 
_refine_ls_wR_factor_ref          0.1605 
_refine_ls_wR_factor_gt           0.1358 
_refine_ls_goodness_of_fit_ref    1.059 
_refine_ls_restrained_S_all       1.059 
_refine_ls_shift/su_max           0.003 
_refine_ls_shift/su_mean          0.001 
 
loop_ 
 _atom_site_label 
 _atom_site_type_symbol 
 _atom_site_fract_x 
 _atom_site_fract_y 
 _atom_site_fract_z 
 _atom_site_U_iso_or_equiv 
 _atom_site_adp_type 
 _atom_site_occupancy 
 _atom_site_calc_flag 
 _atom_site_refinement_flags 
 _atom_site_disorder_assembly 
 _atom_site_disorder_group 
Cr1 Cr 0.45832(5) 0.65360(4) 0.71607(4) 0.0207(2) Uani 1 d . . . 
S1 S 0.48473(8) 0.72830(6) 0.63825(6) 0.0222(3) Uani 1 d . . . 
S2 S 0.32773(9) 0.71000(6) 0.73842(6) 0.0249(3) Uani 1 d . . . 
C1 C 0.3855(3) 0.7747(2) 0.6290(2) 0.0223(11) Uani 1 d . . . 
C2 C 0.3169(3) 0.7672(2) 0.6776(2) 0.0216(11) Uani 1 d . . . 
C3 C 0.2364(3) 0.8037(2) 0.6761(2) 0.0249(12) Uani 1 d . . . 
H3 H 0.1926 0.7995 0.7107 0.030 Uiso 1 calc R . . 
C4 C 0.2196(3) 0.8451(2) 0.6263(2) 0.0259(12) Uani 1 d . . . 
C5 C 0.2881(3) 0.8517(2) 0.5774(2) 0.0240(12) Uani 1 d . . . 
H5 H 0.2773 0.8806 0.5425 0.029 Uiso 1 calc R . . 
C6 C 0.3710(3) 0.8182(2) 0.5775(2) 0.0228(12) Uani 1 d . . . 
C7 C 0.4414(3) 0.8281(2) 0.5207(2) 0.0261(12) Uani 1 d . . . 
C8 C 0.5366(3) 0.8495(3) 0.5484(3) 0.0352(14) Uani 1 d . . . 
H8A H 0.5601 0.8189 0.5804 0.053 Uiso 1 calc R . . 
H8B H 0.5296 0.8897 0.5705 0.053 Uiso 1 calc R . . 
H8C H 0.5805 0.8535 0.5118 0.053 Uiso 1 calc R . . 
C9 C 0.4095(4) 0.8776(3) 0.4711(3) 0.0323(13) Uani 1 d . . . 
H9A H 0.3993 0.9168 0.4945 0.048 Uiso 1 calc R . . 
H9B H 0.3515 0.8643 0.4495 0.048 Uiso 1 calc R . . 
H9C H 0.4573 0.8835 0.4374 0.048 Uiso 1 calc R . . 
C10 C 0.4505(4) 0.7675(3) 0.4817(3) 0.0403(15) Uani 1 d . . . 
H10A H 0.4697 0.7341 0.5120 0.060 Uiso 1 calc R . . 
H10B H 0.4970 0.7725 0.4470 0.060 Uiso 1 calc R . . 
H10C H 0.3905 0.7569 0.4612 0.060 Uiso 1 calc R . . 
C11 C 0.1290(4) 0.8832(3) 0.6250(3) 0.0316(13) Uani 1 d . . . 
C12 C 0.1166(4) 0.9225(3) 0.5627(3) 0.0409(15) Uani 1 d . . . 
H12A H 0.1670 0.9529 0.5604 0.061 Uiso 1 calc R . . 
H12B H 0.0569 0.9442 0.5643 0.061 Uiso 1 calc R . . 
H12C H 0.1179 0.8957 0.5234 0.061 Uiso 1 calc R . . 
C13 C 0.0457(4) 0.8398(3) 0.6299(3) 0.0496(17) Uani 1 d . . . 
H13A H 0.0477 0.8182 0.6727 0.074 Uiso 1 calc R . . 
H13B H 0.0477 0.8093 0.5938 0.074 Uiso 1 calc R . . 
H13C H -0.0118 0.8639 0.6262 0.074 Uiso 1 calc R . . 
C14 C 0.1314(4) 0.9276(3) 0.6856(3) 0.0505(18) Uani 1 d . . . 
H14A H 0.1380 0.9034 0.7266 0.076 Uiso 1 calc R . . 
H14B H 0.0736 0.9514 0.6869 0.076 Uiso 1 calc R . . 
H14C H 0.1841 0.9560 0.6818 0.076 Uiso 1 calc R . . 
S21 S 0.38743(8) 0.58786(6) 0.78977(6) 0.0228(3) Uani 1 d . . . 
S22 S 0.39692(9) 0.58651(6) 0.63642(6) 0.0250(3) Uani 1 d . . . 
C21 C 0.2958(3) 0.5526(2) 0.7456(2) 0.0237(12) Uani 1 d . . . 
C22 C 0.3067(3) 0.5473(2) 0.6762(2) 0.0237(12) Uani 1 d . . . 
C23 C 0.2446(3) 0.5114(2) 0.6385(2) 0.0244(12) Uani 1 d . . . 
H23 H 0.2541 0.5070 0.5921 0.029 Uiso 1 calc R . . 
C24 C 0.1703(3) 0.4825(2) 0.6673(3) 0.0280(13) Uani 1 d . . . 
C25 C 0.1572(3) 0.4918(2) 0.7356(2) 0.0271(12) Uani 1 d . . . 
H25 H 0.1041 0.4737 0.7553 0.033 Uiso 1 calc R . . 
C26 C 0.2169(3) 0.5257(2) 0.7760(2) 0.0253(12) Uani 1 d . . . 
C27 C 0.1939(3) 0.5363(3) 0.8503(2) 0.0293(13) Uani 1 d . . . 
C28 C 0.1012(4) 0.5065(3) 0.8693(3) 0.0382(15) Uani 1 d . . . 
H28A H 0.0885 0.5151 0.9161 0.057 Uiso 1 calc R . . 
H28B H 0.1047 0.4616 0.8624 0.057 Uiso 1 calc R . . 
H28C H 0.0513 0.5237 0.8415 0.057 Uiso 1 calc R . . 
C29 C 0.2688(4) 0.5068(3) 0.8959(2) 0.0319(13) Uani 1 d . . . 
H29A H 0.2524 0.5133 0.9424 0.048 Uiso 1 calc R . . 
H29B H 0.3290 0.5261 0.8872 0.048 Uiso 1 calc R . . 
H29C H 0.2725 0.4622 0.8868 0.048 Uiso 1 calc R . . 
C30 C 0.1840(4) 0.6066(2) 0.8631(3) 0.0322(13) Uani 1 d . . . 
H30A H 0.1691 0.6136 0.9098 0.048 Uiso 1 calc R . . 
H30B H 0.1341 0.6233 0.8348 0.048 Uiso 1 calc R . . 
H30C H 0.2425 0.6274 0.8526 0.048 Uiso 1 calc R . . 
C31 C 0.1047(3) 0.4411(3) 0.6255(3) 0.0301(13) Uani 1 d . . . 
C32 C 0.1589(4) 0.3837(3) 0.6032(3) 0.0494(17) Uani 1 d . . . 
H32A H 0.1758 0.3587 0.6421 0.074 Uiso 1 calc R . . 
H32B H 0.2153 0.3968 0.5804 0.074 Uiso 1 calc R . . 
H32C H 0.1202 0.3590 0.5728 0.074 Uiso 1 calc R . . 
C33 C 0.0196(4) 0.4185(3) 0.6647(3) 0.0487(17) Uani 1 d . . . 
H33A H 0.0406 0.3943 0.7032 0.073 Uiso 1 calc R . . 
H33B H -0.0195 0.3925 0.6359 0.073 Uiso 1 calc R . . 
H33C H -0.0162 0.4543 0.6798 0.073 Uiso 1 calc R . . 
C34 C 0.0701(4) 0.4762(3) 0.5648(3) 0.0515(17) Uani 1 d . . . 
H34A H 0.0289 0.4494 0.5384 0.077 Uiso 1 calc R . . 
H34B H 0.1231 0.4887 0.5379 0.077 Uiso 1 calc R . . 
H34C H 0.0360 0.5131 0.5789 0.077 Uiso 1 calc R . . 
S41 S 0.60445(9) 0.62189(6) 0.68566(6) 0.0246(3) Uani 1 d . . . 
S42 S 0.53152(9) 0.68651(6) 0.81139(6) 0.0245(3) Uani 1 d . . . 
C41 C 0.6855(3) 0.6457(2) 0.7464(3) 0.0252(12) Uani 1 d . . . 
C42 C 0.6492(3) 0.6701(2) 0.8054(2) 0.0237(12) Uani 1 d . . . 
C43 C 0.7059(4) 0.6821(2) 0.8614(3) 0.0290(13) Uani 1 d . . . 
H43 H 0.6792 0.6983 0.9007 0.035 Uiso 1 calc R . . 
C44 C 0.7990(4) 0.6706(2) 0.8598(3) 0.0317(13) Uani 1 d . . . 
C45 C 0.8355(4) 0.6485(3) 0.7997(3) 0.0383(14) Uani 1 d . . . 
H45 H 0.9005 0.6410 0.7983 0.046 Uiso 1 calc R . . 
C46 C 0.7838(4) 0.6368(2) 0.7426(3) 0.0327(13) Uani 1 d . . . 
C47 C 0.8314(4) 0.6135(3) 0.6791(3) 0.0371(14) Uani 1 d . . . 
C48 C 0.8021(4) 0.5471(3) 0.6623(3) 0.0388(15) Uani 1 d . . . 
H48A H 0.8342 0.5333 0.6222 0.058 Uiso 1 calc R . . 
H48B H 0.7348 0.5457 0.6544 0.058 Uiso 1 calc R . . 
H48C H 0.8185 0.5197 0.6994 0.058 Uiso 1 calc R . . 
C49 C 0.9385(4) 0.6129(4) 0.6874(3) 0.059(2) Uani 1 d . . . 
H49A H 0.9667 0.5991 0.6459 0.088 Uiso 1 calc R . . 
H49B H 0.9561 0.5845 0.7233 0.088 Uiso 1 calc R . . 
H49C H 0.9603 0.6548 0.6981 0.088 Uiso 1 calc R . . 
C50 C 0.8088(4) 0.6569(3) 0.6209(3) 0.0475(17) Uani 1 d . . . 
H50A H 0.8369 0.6408 0.5803 0.071 Uiso 1 calc R . . 
H50B H 0.8337 0.6983 0.6305 0.071 Uiso 1 calc R . . 
H50C H 0.7413 0.6595 0.6148 0.071 Uiso 1 calc R . . 
C51 C 0.8628(4) 0.6771(3) 0.9217(3) 0.0413(15) Uani 1 d . . . 
C52 C 0.9517(4) 0.7117(3) 0.9040(3) 0.0565(19) Uani 1 d . . . 
H52A H 0.9906 0.7165 0.9439 0.085 Uiso 1 calc R . . 
H52B H 0.9359 0.7527 0.8861 0.085 Uiso 1 calc R . . 
H52C H 0.9857 0.6881 0.8706 0.085 Uiso 1 calc R . . 
C53 C 0.8154(4) 0.7121(3) 0.9771(3) 0.0535(18) Uani 1 d . . . 
H53A H 0.8584 0.7163 1.0150 0.080 Uiso 1 calc R . . 
H53B H 0.7601 0.6892 0.9910 0.080 Uiso 1 calc R . . 
H53C H 0.7971 0.7533 0.9613 0.080 Uiso 1 calc R . . 
C54 C 0.8877(5) 0.6113(3) 0.9459(4) 0.066(2) Uani 1 d . . . 
H54A H 0.9290 0.6140 0.9848 0.099 Uiso 1 calc R . . 
H54B H 0.9191 0.5888 0.9103 0.099 Uiso 1 calc R . . 
H54C H 0.8309 0.5892 0.9578 0.099 Uiso 1 calc R . . 
N60 N 0.4813(3) 0.60264(18) 0.3110(2) 0.0263(10) Uani 1 d . . . 
C61 C 0.3928(3) 0.6384(3) 0.3274(3) 0.0327(14) Uani 1 d . . . 
H61A H 0.4108 0.6808 0.3412 0.039 Uiso 1 calc R . . 
H61B H 0.3551 0.6422 0.2862 0.039 Uiso 1 calc R . . 
C62 C 0.3323(4) 0.6112(3) 0.3808(3) 0.0406(15) Uani 1 d . . . 
H62A H 0.3665 0.6113 0.4237 0.049 Uiso 1 calc R . . 
H62B H 0.3167 0.5678 0.3694 0.049 Uiso 1 calc R . . 
C63 C 0.2425(4) 0.6490(4) 0.3873(3) 0.063(2) Uani 1 d . . . 
H63A H 0.2577 0.6938 0.3881 0.076 Uiso 1 calc R . . 
H63B H 0.2016 0.6411 0.3484 0.076 Uiso 1 calc R . . 
C64 C 0.1921(5) 0.6320(5) 0.4501(4) 0.096(3) Uani 1 d . . . 
H64A H 0.1754 0.5880 0.4488 0.144 Uiso 1 calc R . . 
H64B H 0.1356 0.6571 0.4535 0.144 Uiso 1 calc R . . 
H64C H 0.2325 0.6399 0.4886 0.144 Uiso 1 calc R . . 
C65 C 0.5301(4) 0.5814(2) 0.3743(2) 0.0269(12) Uani 1 d . . . 
H65A H 0.5849 0.5565 0.3619 0.032 Uiso 1 calc R . . 
H65B H 0.4874 0.5537 0.3986 0.032 Uiso 1 calc R . . 
C66 C 0.5620(4) 0.6322(3) 0.4214(3) 0.0349(14) Uani 1 d . . . 
H66A H 0.5200 0.6683 0.4167 0.042 Uiso 1 calc R . . 
H66B H 0.6252 0.6457 0.4090 0.042 Uiso 1 calc R . . 
C67 C 0.5632(4) 0.6110(3) 0.4933(3) 0.0435(16) Uani 1 d . . . 
H67A H 0.5889 0.6451 0.5208 0.052 Uiso 1 calc R . . 
H67B H 0.4982 0.6046 0.5071 0.052 Uiso 1 calc R . . 
C68 C 0.6163(4) 0.5535(3) 0.5097(3) 0.0418(15) Uani 1 d . . . 
H68A H 0.6074 0.5429 0.5565 0.063 Uiso 1 calc R . . 
H68B H 0.6824 0.5604 0.5016 0.063 Uiso 1 calc R . . 
H68C H 0.5938 0.5193 0.4817 0.063 Uiso 1 calc R . . 
C69 C 0.4578(4) 0.5446(2) 0.2717(2) 0.0281(12) Uani 1 d . . . 
H69A H 0.5145 0.5187 0.2698 0.034 Uiso 1 calc R . . 
H69B H 0.4112 0.5209 0.2971 0.034 Uiso 1 calc R . . 
C70 C 0.4210(4) 0.5522(3) 0.2018(3) 0.0322(13) Uani 1 d . . . 
H70A H 0.4705 0.5689 0.1732 0.039 Uiso 1 calc R . . 
H70B H 0.3688 0.5821 0.2015 0.039 Uiso 1 calc R . . 
C71 C 0.3880(4) 0.4901(3) 0.1750(3) 0.0362(14) Uani 1 d . . . 
H71A H 0.4338 0.4582 0.1884 0.043 Uiso 1 calc R . . 
H71B H 0.3286 0.4797 0.1965 0.043 Uiso 1 calc R . . 
C72 C 0.3739(4) 0.4864(3) 0.1009(3) 0.0465(16) Uani 1 d . . . 
H72A H 0.3489 0.4456 0.0891 0.070 Uiso 1 calc R . . 
H72B H 0.4334 0.4926 0.0788 0.070 Uiso 1 calc R . . 
H72C H 0.3301 0.5187 0.0865 0.070 Uiso 1 calc R . . 
C73 C 0.5411(3) 0.6470(2) 0.2719(3) 0.0295(13) Uani 1 d . . . 
H73A H 0.5536 0.6837 0.3000 0.035 Uiso 1 calc R . . 
H73B H 0.5045 0.6613 0.2329 0.035 Uiso 1 calc R . . 
C74 C 0.6336(4) 0.6229(2) 0.2472(3) 0.0317(13) Uani 1 d . . . 
H74A H 0.6234 0.5941 0.2095 0.038 Uiso 1 calc R . . 
H74B H 0.6665 0.6002 0.2831 0.038 Uiso 1 calc R . . 
C75 C 0.6916(4) 0.6788(3) 0.2248(3) 0.0407(15) Uani 1 d . . . 
H75A H 0.6531 0.7046 0.1946 0.049 Uiso 1 calc R . . 
H75B H 0.7073 0.7042 0.2643 0.049 Uiso 1 calc R . . 
C76 C 0.7808(4) 0.6621(3) 0.1898(3) 0.0495(17) Uani 1 d . . . 
H76A H 0.8167 0.6999 0.1816 0.074 Uiso 1 calc R . . 
H76B H 0.7659 0.6420 0.1473 0.074 Uiso 1 calc R . . 
H76C H 0.8173 0.6338 0.2176 0.074 Uiso 1 calc R . . 
 
loop_ 
 _atom_site_aniso_label 
 _atom_site_aniso_U_11 
 _atom_site_aniso_U_22 
 _atom_site_aniso_U_33 
 _atom_site_aniso_U_23 
 _atom_site_aniso_U_13 
 _atom_site_aniso_U_12 
Cr1 0.0253(4) 0.0194(4) 0.0173(4) -0.0002(4) -0.0001(3) 0.0005(4) 
S1 0.0243(7) 0.0230(7) 0.0193(7) 0.0018(6) 0.0024(5) 0.0026(6) 
S2 0.0284(7) 0.0239(7) 0.0224(7) 0.0023(6) 0.0054(5) 0.0007(6) 
C1 0.026(3) 0.017(3) 0.024(3) -0.007(2) 0.000(2) -0.002(2) 
C2 0.026(3) 0.023(3) 0.017(3) -0.005(2) -0.001(2) -0.002(2) 
C3 0.024(3) 0.029(3) 0.023(3) -0.003(2) 0.004(2) -0.002(2) 
C4 0.026(3) 0.027(3) 0.024(3) -0.005(2) -0.006(2) 0.002(2) 
C5 0.030(3) 0.024(3) 0.018(3) -0.004(2) -0.003(2) -0.001(2) 
C6 0.031(3) 0.018(3) 0.020(3) -0.003(2) -0.001(2) 0.004(2) 
C7 0.033(3) 0.026(3) 0.020(3) 0.003(2) 0.003(2) 0.006(2) 
C8 0.032(3) 0.037(3) 0.037(3) 0.014(3) 0.010(2) 0.005(3) 
C9 0.038(3) 0.035(3) 0.024(3) 0.004(3) 0.003(2) 0.006(3) 
C10 0.063(4) 0.037(4) 0.022(3) 0.000(3) 0.011(3) 0.014(3) 
C11 0.030(3) 0.034(3) 0.030(3) 0.001(3) 0.003(2) 0.009(3) 
C12 0.034(3) 0.046(4) 0.043(4) 0.004(3) 0.000(3) 0.018(3) 
C13 0.028(3) 0.049(4) 0.072(5) 0.016(4) 0.001(3) 0.008(3) 
C14 0.048(4) 0.062(5) 0.040(4) -0.012(3) -0.004(3) 0.025(3) 
S21 0.0269(7) 0.0233(7) 0.0183(7) 0.0001(6) 0.0002(5) -0.0030(6) 
S22 0.0317(7) 0.0260(8) 0.0173(7) -0.0010(6) 0.0022(5) -0.0015(6) 
C21 0.030(3) 0.022(3) 0.019(3) 0.001(2) 0.000(2) 0.000(2) 
C22 0.029(3) 0.018(3) 0.024(3) 0.001(2) -0.002(2) 0.006(2) 
C23 0.028(3) 0.025(3) 0.021(3) -0.003(2) 0.000(2) 0.002(2) 
C24 0.028(3) 0.021(3) 0.035(3) -0.002(2) -0.008(2) 0.006(2) 
C25 0.026(3) 0.031(3) 0.025(3) 0.002(2) -0.002(2) -0.002(2) 
C26 0.025(3) 0.026(3) 0.025(3) 0.001(2) -0.001(2) 0.001(2) 
C27 0.027(3) 0.037(3) 0.024(3) -0.001(3) 0.003(2) -0.011(3) 
C28 0.034(3) 0.052(4) 0.029(3) -0.005(3) 0.008(3) -0.013(3) 
C29 0.041(3) 0.032(3) 0.023(3) 0.000(2) 0.002(2) -0.008(3) 
C30 0.031(3) 0.037(3) 0.029(3) -0.005(3) 0.009(2) -0.002(3) 
C31 0.026(3) 0.036(3) 0.029(3) -0.004(3) -0.003(2) 0.001(3) 
C32 0.043(4) 0.045(4) 0.059(4) -0.015(3) -0.009(3) -0.005(3) 
C33 0.036(3) 0.057(4) 0.053(4) -0.010(3) -0.002(3) -0.019(3) 
C34 0.055(4) 0.054(4) 0.045(4) -0.003(3) -0.015(3) -0.012(3) 
S41 0.0270(7) 0.0264(7) 0.0204(7) 0.0009(6) 0.0011(5) 0.0049(6) 
S42 0.0292(7) 0.0249(7) 0.0193(7) -0.0011(6) 0.0007(5) -0.0036(6) 
C41 0.029(3) 0.019(3) 0.027(3) 0.004(2) 0.003(2) -0.002(2) 
C42 0.030(3) 0.018(3) 0.024(3) 0.005(2) -0.001(2) -0.003(2) 
C43 0.036(3) 0.026(3) 0.025(3) -0.001(2) 0.001(2) -0.003(3) 
C44 0.032(3) 0.022(3) 0.041(4) 0.002(3) -0.001(3) 0.000(2) 
C45 0.026(3) 0.040(4) 0.049(4) -0.006(3) -0.003(3) 0.004(3) 
C46 0.031(3) 0.031(3) 0.036(3) -0.004(3) 0.006(3) 0.000(3) 
C47 0.030(3) 0.042(4) 0.039(4) -0.008(3) 0.007(3) 0.003(3) 
C48 0.035(3) 0.043(4) 0.038(4) -0.009(3) 0.006(3) 0.006(3) 
C49 0.035(4) 0.084(5) 0.057(5) -0.029(4) 0.008(3) 0.000(4) 
C50 0.053(4) 0.045(4) 0.045(4) -0.008(3) 0.020(3) -0.013(3) 
C51 0.033(3) 0.048(4) 0.043(4) -0.009(3) -0.013(3) -0.003(3) 
C52 0.042(4) 0.068(5) 0.059(5) -0.025(4) -0.009(3) 0.002(4) 
C53 0.047(4) 0.074(5) 0.039(4) -0.011(4) -0.012(3) -0.006(4) 
C54 0.081(5) 0.051(5) 0.064(5) 0.001(4) -0.039(4) 0.010(4) 
N60 0.033(2) 0.019(2) 0.027(3) 0.0024(19) 0.0011(19) 0.000(2) 
C61 0.031(3) 0.032(3) 0.035(3) 0.001(3) -0.002(2) 0.009(3) 
C62 0.039(3) 0.045(4) 0.038(4) 0.003(3) 0.003(3) 0.004(3) 
C63 0.038(4) 0.101(6) 0.051(5) 0.001(4) 0.011(3) 0.004(4) 
C64 0.063(5) 0.146(9) 0.079(6) -0.016(6) 0.004(5) 0.007(6) 
C65 0.034(3) 0.022(3) 0.025(3) 0.005(2) 0.001(2) 0.008(2) 
C66 0.046(4) 0.029(3) 0.030(3) -0.010(3) -0.007(3) 0.009(3) 
C67 0.060(4) 0.040(4) 0.030(3) -0.011(3) -0.008(3) 0.007(3) 
C68 0.046(4) 0.051(4) 0.028(3) -0.008(3) 0.000(3) 0.006(3) 
C69 0.037(3) 0.021(3) 0.026(3) -0.001(2) -0.004(2) -0.001(2) 
C70 0.041(3) 0.031(3) 0.024(3) 0.004(2) -0.002(2) 0.001(3) 
C71 0.042(3) 0.032(3) 0.035(3) 0.000(3) -0.008(3) -0.001(3) 
C72 0.067(4) 0.036(4) 0.036(4) -0.001(3) -0.010(3) -0.007(3) 
C73 0.037(3) 0.019(3) 0.033(3) 0.002(2) -0.005(2) 0.000(3) 
C74 0.036(3) 0.027(3) 0.032(3) 0.000(3) -0.001(2) 0.000(3) 
C75 0.042(4) 0.029(3) 0.051(4) 0.000(3) -0.002(3) -0.003(3) 
C76 0.052(4) 0.040(4) 0.057(4) 0.006(3) 0.009(3) -0.003(3) 
 
_geom_special_details 
; 
 All esds (except the esd in the dihedral angle between two l.s. planes) 
 are estimated using the full covariance matrix.  The cell esds are taken 
 into account individually in the estimation of esds in distances, angles 
 and torsion angles; correlations between esds in cell parameters are only 
 used when they are defined by crystal symmetry.  An approximate (isotropic) 
 treatment of cell esds is used for estimating esds involving l.s. planes. 
; 
 
loop_ 
 _geom_bond_atom_site_label_1 
 _geom_bond_atom_site_label_2 
 _geom_bond_distance 
 _geom_bond_site_symmetry_2 
 _geom_bond_publ_flag 
Cr1 S1 2.2831(15) . ? 
Cr1 S2 2.2900(15) . ? 
Cr1 S42 2.2911(15) . ? 
Cr1 S21 2.3010(15) . ? 
Cr1 S41 2.3037(15) . ? 
Cr1 S22 2.3272(15) . ? 
S1 C1 1.754(5) . ? 
S2 C2 1.746(5) . ? 
C1 C2 1.408(7) . ? 
C1 C6 1.411(7) . ? 
C2 C3 1.401(7) . ? 
C3 C4 1.363(7) . ? 
C4 C5 1.410(7) . ? 
C4 C11 1.543(7) . ? 
C5 C6 1.397(7) . ? 
C6 C7 1.554(7) . ? 
C7 C9 1.530(7) . ? 
C7 C10 1.531(7) . ? 
C7 C8 1.545(7) . ? 
C11 C12 1.521(7) . ? 
C11 C13 1.527(8) . ? 
C11 C14 1.552(8) . ? 
S21 C21 1.756(5) . ? 
S22 C22 1.753(5) . ? 
C21 C22 1.412(7) . ? 
C21 C26 1.422(7) . ? 
C22 C23 1.399(7) . ? 
C23 C24 1.374(7) . ? 
C24 C25 1.404(7) . ? 
C24 C31 1.543(7) . ? 
C25 C26 1.385(7) . ? 
C26 C27 1.555(7) . ? 
C27 C28 1.535(7) . ? 
C27 C29 1.544(7) . ? 
C27 C30 1.544(7) . ? 
C31 C34 1.515(8) . ? 
C31 C32 1.534(8) . ? 
C31 C33 1.544(7) . ? 
S41 C41 1.757(5) . ? 
S42 C42 1.738(5) . ? 
C41 C42 1.406(7) . ? 
C41 C46 1.432(7) . ? 
C42 C43 1.409(7) . ? 
C43 C44 1.364(7) . ? 
C44 C45 1.408(8) . ? 
C44 C51 1.545(7) . ? 
C45 C46 1.386(8) . ? 
C46 C47 1.544(7) . ? 
C47 C48 1.530(8) . ? 
C47 C50 1.532(8) . ? 
C47 C49 1.549(8) . ? 
C51 C53 1.517(8) . ? 
C51 C52 1.528(8) . ? 
C51 C54 1.543(9) . ? 
N60 C73 1.515(6) . ? 
N60 C65 1.519(6) . ? 
N60 C69 1.518(6) . ? 
N60 C61 1.529(6) . ? 
C61 C62 1.511(7) . ? 
C62 C63 1.537(8) . ? 
C63 C64 1.510(10) . ? 
C65 C66 1.517(7) . ? 
C66 C67 1.520(8) . ? 
C67 C68 1.492(8) . ? 
C69 C70 1.507(7) . ? 
C70 C71 1.519(7) . ? 
C71 C72 1.505(7) . ? 
C73 C74 1.519(7) . ? 
C74 C75 1.538(7) . ? 
C75 C76 1.516(8) . ? 
 
loop_ 
 _geom_angle_atom_site_label_1 
 _geom_angle_atom_site_label_2 
 _geom_angle_atom_site_label_3 
 _geom_angle 
 _geom_angle_site_symmetry_1 
 _geom_angle_site_symmetry_3 
 _geom_angle_publ_flag 
S1 Cr1 S2 84.49(5) . . ? 
S1 Cr1 S42 106.09(6) . . ? 
S2 Cr1 S42 92.39(5) . . ? 
S1 Cr1 S21 163.11(6) . . ? 
S2 Cr1 S21 80.14(5) . . ? 
S42 Cr1 S21 81.63(5) . . ? 
S1 Cr1 S41 82.34(5) . . ? 
S2 Cr1 S41 164.97(6) . . ? 
S42 Cr1 S41 84.37(5) . . ? 
S21 Cr1 S41 113.74(6) . . ? 
S1 Cr1 S22 91.80(5) . . ? 
S2 Cr1 S22 99.19(5) . . ? 
S42 Cr1 S22 159.58(6) . . ? 
S21 Cr1 S22 83.85(5) . . ? 
S41 Cr1 S22 88.45(5) . . ? 
C1 S1 Cr1 109.48(17) . . ? 
C2 S2 Cr1 107.74(17) . . ? 
C2 C1 C6 119.2(4) . . ? 
C2 C1 S1 116.0(4) . . ? 
C6 C1 S1 124.8(4) . . ? 
C3 C2 C1 120.6(5) . . ? 
C3 C2 S2 118.6(4) . . ? 
C1 C2 S2 120.7(4) . . ? 
C4 C3 C2 121.5(5) . . ? 
C3 C4 C5 117.4(5) . . ? 
C3 C4 C11 120.3(5) . . ? 
C5 C4 C11 122.2(5) . . ? 
C6 C5 C4 123.5(5) . . ? 
C5 C6 C1 117.7(5) . . ? 
C5 C6 C7 119.6(4) . . ? 
C1 C6 C7 122.7(4) . . ? 
C9 C7 C10 106.8(4) . . ? 
C9 C7 C8 106.5(4) . . ? 
C10 C7 C8 111.1(4) . . ? 
C9 C7 C6 112.5(4) . . ? 
C10 C7 C6 108.7(4) . . ? 
C8 C7 C6 111.1(4) . . ? 
C12 C11 C13 108.1(5) . . ? 
C12 C11 C4 113.7(4) . . ? 
C13 C11 C4 109.7(5) . . ? 
C12 C11 C14 107.8(5) . . ? 
C13 C11 C14 109.8(5) . . ? 
C4 C11 C14 107.7(4) . . ? 
C21 S21 Cr1 106.08(17) . . ? 
C22 S22 Cr1 105.26(17) . . ? 
C22 C21 C26 119.5(4) . . ? 
C22 C21 S21 116.4(4) . . ? 
C26 C21 S21 124.0(4) . . ? 
C23 C22 C21 120.2(5) . . ? 
C23 C22 S22 119.5(4) . . ? 
C21 C22 S22 120.3(4) . . ? 
C24 C23 C22 121.3(5) . . ? 
C23 C24 C25 117.6(5) . . ? 
C23 C24 C31 120.6(5) . . ? 
C25 C24 C31 121.9(5) . . ? 
C26 C25 C24 124.1(5) . . ? 
C25 C26 C21 117.2(5) . . ? 
C25 C26 C27 120.4(4) . . ? 
C21 C26 C27 122.4(4) . . ? 
C28 C27 C29 106.4(4) . . ? 
C28 C27 C30 106.8(4) . . ? 
C29 C27 C30 111.8(4) . . ? 
C28 C27 C26 112.0(4) . . ? 
C29 C27 C26 110.8(4) . . ? 
C30 C27 C26 109.0(4) . . ? 
C34 C31 C32 109.3(5) . . ? 
C34 C31 C24 110.1(5) . . ? 
C32 C31 C24 108.4(4) . . ? 
C34 C31 C33 108.3(5) . . ? 
C32 C31 C33 107.7(5) . . ? 
C24 C31 C33 112.9(4) . . ? 
C41 S41 Cr1 109.28(17) . . ? 
C42 S42 Cr1 108.55(17) . . ? 
C42 C41 C46 118.2(5) . . ? 
C42 C41 S41 116.5(4) . . ? 
C46 C41 S41 125.0(4) . . ? 
C41 C42 C43 121.8(5) . . ? 
C41 C42 S42 120.5(4) . . ? 
C43 C42 S42 117.6(4) . . ? 
C44 C43 C42 120.5(5) . . ? 
C43 C44 C45 117.4(5) . . ? 
C43 C44 C51 122.6(5) . . ? 
C45 C44 C51 119.9(5) . . ? 
C46 C45 C44 124.8(5) . . ? 
C45 C46 C41 117.0(5) . . ? 
C45 C46 C47 120.5(5) . . ? 
C41 C46 C47 122.5(5) . . ? 
C48 C47 C50 110.4(5) . . ? 
C48 C47 C46 111.3(5) . . ? 
C50 C47 C46 110.0(5) . . ? 
C48 C47 C49 106.8(5) . . ? 
C50 C47 C49 106.8(5) . . ? 
C46 C47 C49 111.4(5) . . ? 
C53 C51 C52 108.4(5) . . ? 
C53 C51 C54 109.3(6) . . ? 
C52 C51 C54 109.3(5) . . ? 
C53 C51 C44 111.7(5) . . ? 
C52 C51 C44 110.4(5) . . ? 
C54 C51 C44 107.8(5) . . ? 
C73 N60 C65 111.5(4) . . ? 
C73 N60 C69 112.0(4) . . ? 
C65 N60 C69 106.6(4) . . ? 
C73 N60 C61 105.9(4) . . ? 
C65 N60 C61 110.4(4) . . ? 
C69 N60 C61 110.3(4) . . ? 
C62 C61 N60 116.6(4) . . ? 
C61 C62 C63 110.4(5) . . ? 
C64 C63 C62 110.9(6) . . ? 
N60 C65 C66 116.1(4) . . ? 
C65 C66 C67 112.1(5) . . ? 
C68 C67 C66 117.5(5) . . ? 
C70 C69 N60 118.0(4) . . ? 
C69 C70 C71 109.9(4) . . ? 
C72 C71 C70 115.9(5) . . ? 
N60 C73 C74 117.4(4) . . ? 
C73 C74 C75 108.0(4) . . ? 
C76 C75 C74 114.7(5) . . ? 
 
_diffrn_measured_fraction_theta_max    0.967 
_diffrn_reflns_theta_full              24.00 
_diffrn_measured_fraction_theta_full   0.967 
_refine_diff_density_max    0.672 
_refine_diff_density_min   -0.421 
_refine_diff_density_rms    0.080 

#===END
